# Supplementary material for: Ethical Dilemmas in Patient Confidentiality: A Case Study of Unintentional Disclosure in an Iranian Emergency Department
Source: Research Square preprint supplement (doi:10.21203/rs.3.rs-6515152/v1), 2025-05-26
Supplement: Supplementary file 1 [file 859e611dff3b2c3d2824608f.docx]

CARE Checklist for "Ethical Dilemmas in Patient Confidentiality: A Case Study of Unintentional Disclosure in an Iranian Emergency Department"

| **Section/Item** | **Item description** | **Line number(s) or N/A** |
| --- | --- | --- |
| Title | The words "case report" should appear in the title | Title (Line 1-2) |
| Key words | 2 to 5 key words identifying main topics | Line 20 |
| Abstract | Summary of case (background, case presentation, conclusion) | Lines 6-19 |
| Introduction | What is unique about this case and medical literature context | Lines 21-45 |
| Patient Information | De-identified demographic information, main concerns, symptoms | Lines 47-53 |
| Clinical Findings | Physical examination and important clinical findings | Lines 47-53 |
| Timeline | Important dates and time-related information | N/A |
| Diagnostic Assessment | Diagnostic methods (e.g., tests, assessments) | Lines 49-51 |
| Therapeutic Intervention | Medical, surgical, preventive, or self-care interventions | N/A |
| Follow-up and Outcomes | Clinical course and outcomes (patient condition) | Lines 54-59 |
| Discussion | Strengths and limitations, literature review, explanation | Lines 61-123 |
| Patient Perspective | Patient's own view or feedback | N/A |
| Informed Consent | Statement about patient consent for publication | Declarations section (to be updated) |
